# Supplementary material for: Spatial modeling of cutaneous leishmaniasis in Iranian army units during 2014-2017 using a hierarchical Bayesian method and the spatial scan statistic
Source: PubMed Central journal article supplement (PMC6186865; doi:10.4178/epih.e2018032), 2018-07-13
Supplement: epih-40-e2018032-supplementary2.pdf [file epih-40-e2018032-supplementary2.pdf]

## Supplementary Material 2

**Table S1.** Median SIRs and the precision parameters (95% credible intervals) (2014-2017)

| Province               | Frequentist analysis | Bayesian analysis |         |          |          |          |         |
|------------------------|----------------------|-------------------|---------|----------|----------|----------|---------|
|                        | Observed SIR         | Mean              | SD      | MC_error | 2.5%     | Median   | 97.5%   |
| Zanjan                 | 0.000                | 0.02909           | 0.05231 | 3.60E-04 | 2.90E-05 | 0.00913  | 0.178   |
| West Azerbaijan        | 0.064                | 0.0644            | 0.04445 | 1.86E-04 | 0.008858 | 0.05439  | 0.1765  |
| Sistan and Baluchestan | 0.678                | 0.6731            | 0.1109  | 3.77E-04 | 0.4742   | 0.6668   | 0.9087  |
| Semnan                 | 0.000                | 0.01455           | 0.02349 | 1.77E-04 | 2.46E-05 | 0.00558  | 0.0811  |
| Qom                    | 0.000                | 0.06369           | 0.1281  | 8.48E-04 | 3.92E-05 | 0.01573  | 0.4336  |
| Qazvin                 | 0.000                | 0.01206           | 0.01923 | 1.54E-04 | 1.84E-05 | 0.004623 | 0.06741 |
| Mazandaran             | 0.000                | 0.01756           | 0.02937 | 2.26E-04 | 2.21E-05 | 0.006262 | 0.102   |
| Markazi                | 0.192                | 0.1749            | 0.1728  | 7.16E-04 | 0.006959 | 0.1213   | 0.6378  |
| Hamadan                | 0.000                | 0.01368           | 0.02153 | 1.82E-04 | 2.49E-05 | 0.005392 | 0.07569 |
| Kurdistan              | 0.000                | 0.01331           | 0.02116 | 1.62E-04 | 2.16E-05 | 0.005131 | 0.07442 |
| Khuzestan              | 2.348                | 2.343             | 0.1537  | 5.09E-04 | 2.051    | 2.341    | 2.654   |
| Razavi Khorasan        | 0.035                | 0.03613           | 0.02446 | 1.08E-04 | 0.005144 | 0.03069  | 0.09795 |
| North Khorasan         | 0.000                | 0.03857           | 0.07245 | 5.30E-04 | 2.52E-05 | 0.01081  | 0.25    |
| Kermanshah             | 67.885               | 67.69             | 3.616   | 0.01192  | 60.78    | 67.6     | 74.98   |
| Kerman                 | 0.207                | 0.2025            | 0.07698 | 2.85E-04 | 0.08135  | 0.1928   | 0.3788  |
| Ilam                   | 0.000                | 0.02109           | 0.03553 | 2.77E-04 | 2.75E-05 | 0.007423 | 0.1232  |
| Hormozgan              | 0.035                | 0.03657           | 0.02469 | 1.13E-04 | 0.00531  | 0.03113  | 0.09853 |
| Lorestan               | 0.000                | 0.01128           | 0.01758 | 1.38E-04 | 2.08E-05 | 0.004523 | 0.06133 |
| Golestan               | 0.048                | 0.05035           | 0.04672 | 2.46E-04 | 0.002413 | 0.03668  | 0.1754  |
| Gilan                  | 0.064                | 0.06499           | 0.06133 | 3.05E-04 | 0.003024 | 0.04687  | 0.2289  |
| Fars                   | 0.385                | 0.3807            | 0.07741 | 2.68E-04 | 0.2442   | 0.3755   | 0.5463  |
| Isfahan                | 6.021                | 6.016             | 0.2832  | 9.64E-04 | 5.475    | 6.01     | 6.59    |

|                    |       |         |         |          |          |         |         |
|--------------------|-------|---------|---------|----------|----------|---------|---------|
| East<br>Azerbaijan | 0.143 | 0.1414  | 0.03932 | 1.44E-04 | 0.07504  | 0.1379  | 0.2281  |
| Bushehr            | 0.096 | 0.09492 | 0.04723 | 1.86E-04 | 0.02651  | 0.08715 | 0.2076  |
| Tehran             | 0.016 | 0.01693 | 0.00740 | 2.83E-05 | 0.005715 | 0.01585 | 0.03411 |
|                    |       |         | 7       |          |          |         |         |
| South<br>Khorasan  | 0.256 | 0.2484  | 0.1018  | 3.75E-04 | 0.09159  | 0.2343  | 0.4841  |
| alpha0             |       | -3.039  | 0.7257  | 0.0333   | -4.569   | -2.995  | -1.734  |
| sigma.b            |       | 0.5865  | 1.547   | 0.06964  | 0.04523  | 0.1518  | 5.807   |
| sigma.h            |       | 2.922   | 0.6962  | 0.0172   | 1.786    | 2.842   | 4.513   |

---

SIR, standardized incidence ratio; SD, standard deviation; MC, Monte Carlo.
