# Supplementary material for: Spatial modeling of cutaneous leishmaniasis in Iranian army units during 2014-2017 using a hierarchical Bayesian method and the spatial scan statistic
Source: PubMed Central journal article supplement (PMC6186865; doi:10.4178/epih.e2018032), 2018-07-13
Supplement: epih-40-e2018032-supplementary3.pdf [file epih-40-e2018032-supplementary3.pdf]

### Supplementary Material 3

Table S2. Median SIRs and the precision parameters (95% credible intervals) (2014-2015)

| Province               | Frequentist analysis | Bayesian analysis |             |          |          |          |         |
|------------------------|----------------------|-------------------|-------------|----------|----------|----------|---------|
|                        | Observed SIR         | Mean              | SD          | MC error | 2.5%     | Median   | 97.5%   |
| Zanjan                 | 0.000                | 0.02555           | 0.06        | 5.61E-04 | 3.58E-11 | 0.003345 | 0.1935  |
| West Azerbaijan        | 0.045                | 0.04548           | 0.0442<br>7 | 1.94E-04 | 0.001628 | 0.03224  | 0.1637  |
| Sistan and Baluchestan | 0.882                | 0.8757            | 0.1509      | 4.95E-04 | 0.6051   | 0.8664   | 1.197   |
| Semnan                 | 0.000                | 0.01209           | 0.0259<br>7 | 2.67E-04 | 3.53E-11 | 0.002137 | 0.086   |
| Qom                    | 0.000                | 0.05634           | 0.1464      | 0.001168 | 2.36E-10 | 0.005557 | 0.4623  |
| Qazvin                 | 0.000                | 0.01006           | 0.0212      | 2.23E-04 | 4.18E-12 | 0.001778 | 0.07136 |
| Mazandaran             | 0.000                | 0.01479           | 0.0327<br>8 | 3.27E-04 | 4.33E-12 | 0.002319 | 0.107   |
| Markazi                | 0.272                | 0.2392            | 0.2475      | 0.001061 | 0.006816 | 0.161    | 0.9105  |
| Hamadan                | 0.000                | 0.01152           | 0.0239      | 2.34E-04 | 1.66E-09 | 0.002134 | 0.08102 |
| Kurdistan              | 0.000                | 0.01102           | 0.0232<br>3 | 2.43E-04 | 2.16E-11 | 0.001957 | 0.0785  |
| Khuzestan              | 2.565                | 2.561             | 0.1917      | 6.43E-04 | 2.201    | 2.556    | 2.948   |
| Razavi Khorasan        | 0.000                | 0.005351          | 0.0106<br>4 | 1.23E-04 | 1.74E-13 | 0.001096 | 0.03632 |
| North Khorasan         | 0.000                | 0.03374           | 0.0851<br>6 | 7.53E-04 | 5.83E-14 | 0.003692 | 0.2669  |
| Kermanshah             | 96.114               | 96.01             | 5.112       | 0.01796  | 86.33    | 95.93    | 106.3   |
| Kerman                 | 0.000                | 0.008422          | 0.0172<br>7 | 1.85E-04 | 2.35E-11 | 0.001617 | 0.05799 |
| Ilam                   | 0.000                | 0.01778           | 0.0391<br>6 | 3.71E-04 | 3.45E-10 | 0.002795 | 0.13    |
| Hormozgan              | 0.000                | 0.005533          | 0.0108<br>9 | 1.24E-04 | 9.56E-12 | 0.001203 | 0.03742 |
| Lorestan               | 0.000                | 0.009526          | 0.0197<br>7 | 2.08E-04 | 6.22E-11 | 0.001743 | 0.06688 |
| Golestan               | 0.068                | 0.06563           | 0.0648<br>7 | 2.86E-04 | 0.002285 | 0.04576  | 0.2417  |
| Gilan                  | 0.091                | 0.08607           | 0.0850<br>9 | 3.40E-04 | 0.002886 | 0.06018  | 0.3153  |
| Fars                   | 0.363                | 0.3593            | 0.0899<br>9 | 3.06E-04 | 0.2053   | 0.3514   | 0.5565  |

|                    |       |         |             |          |          |         |         |
|--------------------|-------|---------|-------------|----------|----------|---------|---------|
| Isfahan            | 3.699 | 3.693   | 0.2637      | 8.85E-04 | 3.196    | 3.687   | 4.23    |
| East<br>Azerbaijan | 0.202 | 0.2     | 0.0557<br>2 | 2.00E-04 | 0.1063   | 0.1945  | 0.324   |
| Bushehr            | 0.034 | 0.03476 | 0.0333<br>8 | 1.56E-04 | 0.001313 | 0.0249  | 0.1241  |
| Tehran             | 0.023 | 0.02334 | 0.0103<br>2 | 3.90E-05 | 0.007668 | 0.02184 | 0.04753 |
| South<br>Khorasan  | 0.363 | 0.3515  | 0.1444      | 4.79E-04 | 0.1283   | 0.3314  | 0.689   |
| alpha0             |       | -4.112  | 1.515       | 0.07236  | -8.225   | -3.793  | -2.021  |
| sigma.b            |       | 3.239   | 9.296       | 0.4249   | 0.04647  | 0.1854  | 33.55   |
| sigma.h            |       | 4.759   | 3.657       | 0.1625   | 2.295    | 3.74    | 16.04   |

---

SIR, standardized incidence ratio; SD, standard deviation; MC, Monte Carlo.
