# Supplementary material for: Spatial modeling of cutaneous leishmaniasis in Iranian army units during 2014-2017 using a hierarchical Bayesian method and the spatial scan statistic
Source: PubMed Central journal article supplement (PMC6186865; doi:10.4178/epih.e2018032), 2018-07-13
Supplement: epih-40-e2018032-supplementary4.pdf [file epih-40-e2018032-supplementary4.pdf]

## Supplementary Material 4

Table S3. Median SIRs and the precision parameters (95% credible intervals) (2015-2016)

| Province               | Frequentist analysis | Bayesian analysis |         |          |          |          |         |
|------------------------|----------------------|-------------------|---------|----------|----------|----------|---------|
|                        | Observed SIR         | Mean              | SD      | MC error | 2.5%     | Median   | 97.5%   |
| Zanjan                 | 0.000                | 0.01857           | 0.1467  | 0.001197 | 0        | 1.06E-18 | 0.1568  |
| West Azerbaijan        | 0.000                | 0.005969          | 0.04274 | 5.09E-04 | 0        | 1.91E-19 | 0.05645 |
| Sistan and Baluchestan | 0.577                | 0.5703            | 0.3308  | 0.001251 | 0.1162   | 0.5083   | 1.384   |
| Semnan                 | 0.000                | 0.009976          | 0.06779 | 6.85E-04 | 0        | 2.44E-15 | 0.1002  |
| Qom                    | 0.000                | 0.06765           | 0.4951  | 0.00239  | 0        | 2.17E-14 | 0.6073  |
| Qazvin                 | 0.000                | 0.004846          | 0.04106 | 5.56E-04 | 0        | 5.55E-28 | 0.03816 |
| Mazandaran             | 0.000                | 0.01147           | 0.08056 | 7.72E-04 | 0        | 1.66E-17 | 0.1093  |
| Markazi                | 0.000                | 0.02178           | 0.1956  | 0.001616 | 0        | 1.75E-22 | 0.1543  |
| Hamadan                | 0.000                | 0.009614          | 0.06313 | 6.42E-04 | 0        | 1.10E-14 | 0.1001  |
| Kurdistan              | 0.000                | 0.00539           | 0.04679 | 6.05E-04 | 0        | 9.14E-30 | 0.03842 |
| Khuzestan              | 2.018                | 2.017             | 0.4626  | 0.001478 | 1.217    | 1.981    | 3.023   |
| Razavi Khorasan        | 0.000                | 0.004243          | 0.02758 | 3.56E-04 | 0        | 1.48E-16 | 0.04443 |
| North Khorasan         | 0.000                | 0.03084           | 0.226   | 0.001594 | 0        | 9.11E-17 | 0.283   |
| Kermanshah             | 0.000                | 0.03045           | 0.2383  | 0.001627 | 0        | 5.53E-17 | 0.2577  |
| Kerman                 | 1.863                | 1.853             | 0.7615  | 0.00297  | 0.6792   | 1.752    | 3.618   |
| Ilam                   | 0.000                | 0.01519           | 0.1041  | 9.10E-04 | 0        | 1.39E-15 | 0.1477  |
| Hormozgan              | 0.183                | 0.1795            | 0.1821  | 7.47E-04 | 0.004407 | 0.1227   | 0.6641  |
| Lorestan               | 0.000                | 0.006504          | 0.04642 | 5.23E-04 | 0        | 7.49E-18 | 0.06229 |
| Golestan               | 0.000                | 0.009059          | 0.0639  | 7.07E-04 | 0        | 1.56E-17 | 0.08526 |
| Gilan                  | 0.000                | 0.01061           | 0.08153 | 7.92E-04 | 0        | 9.23E-19 | 0.09747 |
| Fars                   | 1.177                | 1.171             | 0.444   | 0.001581 | 0.4683   | 1.115    | 2.188   |
| Isfahan                | 10.161               | 10.16             | 1.189   | 0.004204 | 7.95     | 10.11    | 12.61   |
| East Azerbaijan        | 0.000                | 0.002429          | 0.01646 | 2.51E-04 | 0        | 1.05E-19 | 0.02478 |
| Bushehr                | 0.000                | 0.006475          | 0.04029 | 4.40E-04 | 0        | 6.52E-14 | 0.06881 |

|                |       |          |          |          |         |          |        |
|----------------|-------|----------|----------|----------|---------|----------|--------|
| Tehran         | 0.000 | 9.33E-04 | 0.005608 | 1.02E-04 | 0       | 2.26E-17 | 0.0105 |
| South Khorasan | 0.000 | 0.01055  | 0.0652   | 6.15E-04 | 0       | 2.12E-13 | 0.1124 |
| alpha0         |       | -12.22   | 16.65    | 0.8083   | -38.66  | -11.18   | 17.08  |
| sigma.b        |       | 113.1    | 91.07    | 3.997    | 0.06292 | 118.1    | 298.9  |
| sigma.h        |       | 76.25    | 55.97    | 2.427    | 3.292   | 72.15    | 196.3  |

---

SIR, standardized incidence ratio; SD, standard deviation; MC, Monte Carlo.
