# Supplementary material for: Spatial modeling of cutaneous leishmaniasis in Iranian army units during 2014-2017 using a hierarchical Bayesian method and the spatial scan statistic
Source: PubMed Central journal article supplement (PMC6186865; doi:10.4178/epih.e2018032), 2018-07-13
Supplement: epih-40-e2018032-supplementary5.pdf [file epih-40-e2018032-supplementary5.pdf]

## Supplementary Material 5

Table S4. Median SIRs and the precision parameters (95% credible intervals) (2016-2017)

| Province               | Frequentist analysis | Bayesian analysis |         |          |          |          |         |
|------------------------|----------------------|-------------------|---------|----------|----------|----------|---------|
|                        | Observed SIR         | Mean              | SD      | MC error | 2.5%     | Median   | 97.5%   |
| Zanjan                 | 0.000                | 0.02079           | 0.09875 | 0.001254 | 0        | 2.22E-12 | 0.2232  |
| West Azerbaijan        | 0.162                | 0.1521            | 0.1551  | 7.69E-04 | 0.00394  | 0.1036   | 0.5709  |
| Sistan and Baluchestan | 0.000                | 0.00588           | 0.02199 | 3.99E-04 | 0        | 1.78E-10 | 0.06254 |
| Semnan                 | 0.000                | 0.01154           | 0.04788 | 7.09E-04 | 0        | 5.91E-10 | 0.123   |
| Qom                    | 0.000                | 0.05391           | 0.2774  | 0.002174 | 0        | 3.17E-09 | 0.5681  |
| Qazvin                 | 0.000                | 0.00898           | 0.03726 | 6.28E-04 | 0        | 2.53E-12 | 0.09925 |
| Mazandaran             | 0.000                | 0.01265           | 0.05548 | 8.30E-04 | 0        | 4.50E-12 | 0.1386  |
| Markazi                | 0.000                | 0.0315            | 0.1584  | 0.001492 | 0        | 9.53E-10 | 0.327   |
| Hamadan                | 0.000                | 0.01103           | 0.04388 | 6.47E-04 | 0        | 5.66E-09 | 0.1177  |
| Kurdistan              | 0.000                | 0.008552          | 0.03754 | 6.74E-04 | 0        | 6.61E-18 | 0.09385 |
| Khuzestan              | 1.734                | 1.728             | 0.2979  | 0.001132 | 1.191    | 1.711    | 2.356   |
| Razavi Khorasan        | 0.176                | 0.1706            | 0.1222  | 5.57E-04 | 0.02072  | 0.1418   | 0.4822  |
| North Khorasan         | 0.000                | 0.03043           | 0.1488  | 0.001565 | 0        | 9.07E-11 | 0.3243  |
| Kermanshah             | 0.000                | 0.0288            | 0.1442  | 0.001534 | 0        | 4.30E-11 | 0.2983  |
| Kerman                 | 0.149                | 0.1423            | 0.1451  | 7.03E-04 | 0.003782 | 0.09689  | 0.5347  |
| Ilam                   | 0.000                | 0.01739           | 0.07525 | 9.49E-04 | 0        | 2.69E-09 | 0.1841  |
| Hormozgan              | 0.088                | 0.08585           | 0.08584 | 3.71E-04 | 0.002401 | 0.05916  | 0.3169  |
| Lorestan               | 0.000                | 0.008421          | 0.03495 | 5.83E-04 | 0        | 8.21E-12 | 0.09265 |
| Golestan               | 0.000                | 0.01074           | 0.0455  | 7.21E-04 | 0        | 5.75E-12 | 0.1165  |
| Gilan                  | 0.000                | 0.01257           | 0.05658 | 8.32E-04 | 0        | 7.40E-13 | 0.1347  |
| Fars                   | 0.081                | 0.07896           | 0.07895 | 3.26E-04 | 0.00215  | 0.05474  | 0.2901  |

|                    |        |          |         |          |         |          |         |
|--------------------|--------|----------|---------|----------|---------|----------|---------|
| Isfahan            | 12.298 | 12.29    | 0.9057  | 0.003341 | 10.57   | 12.27    | 14.12   |
| East<br>Azerbaijan | 0.000  | 0.003561 | 0.01341 | 2.70E-04 | 0       | 4.84E-13 | 0.03911 |
| Bushehr            | 0.363  | 0.3549   | 0.2083  | 0.001034 | 0.07083 | 0.3148   | 0.8645  |
| Tehran             | 0.000  | 0.00148  | 0.00505 | 1.17E-04 | 0       | 3.23E-12 | 0.01589 |
| South<br>Khorasan  | 0.000  | 0.0112   | 0.04498 | 6.70E-04 | 0       | 2.99E-09 | 0.118   |
| alpha0             |        | -11.5    | 6.982   | 0.3382   | -25.36  | -10.69   | -2.349  |
| sigma.b            |        | 78.3     | 62.46   | 2.804    | 0.06268 | 88.78    | 195     |
| sigma.h            |        | 43.11    | 31.36   | 1.406    | 1.993   | 47.43    | 102.4   |

---

SIR, standardized incidence ratio; SD, standard deviation; MC, Monte Carlo.
