# Supplementary material for: Spatial modeling of cutaneous leishmaniasis in Iranian army units during 2014-2017 using a hierarchical Bayesian method and the spatial scan statistic
Source: PubMed Central journal article supplement (PMC6186865; doi:10.4178/epih.e2018032), 2018-07-13
Supplement: epih-40-e2018032-supplementary6.pdf [file epih-40-e2018032-supplementary6.pdf]

Supplementary Material 6

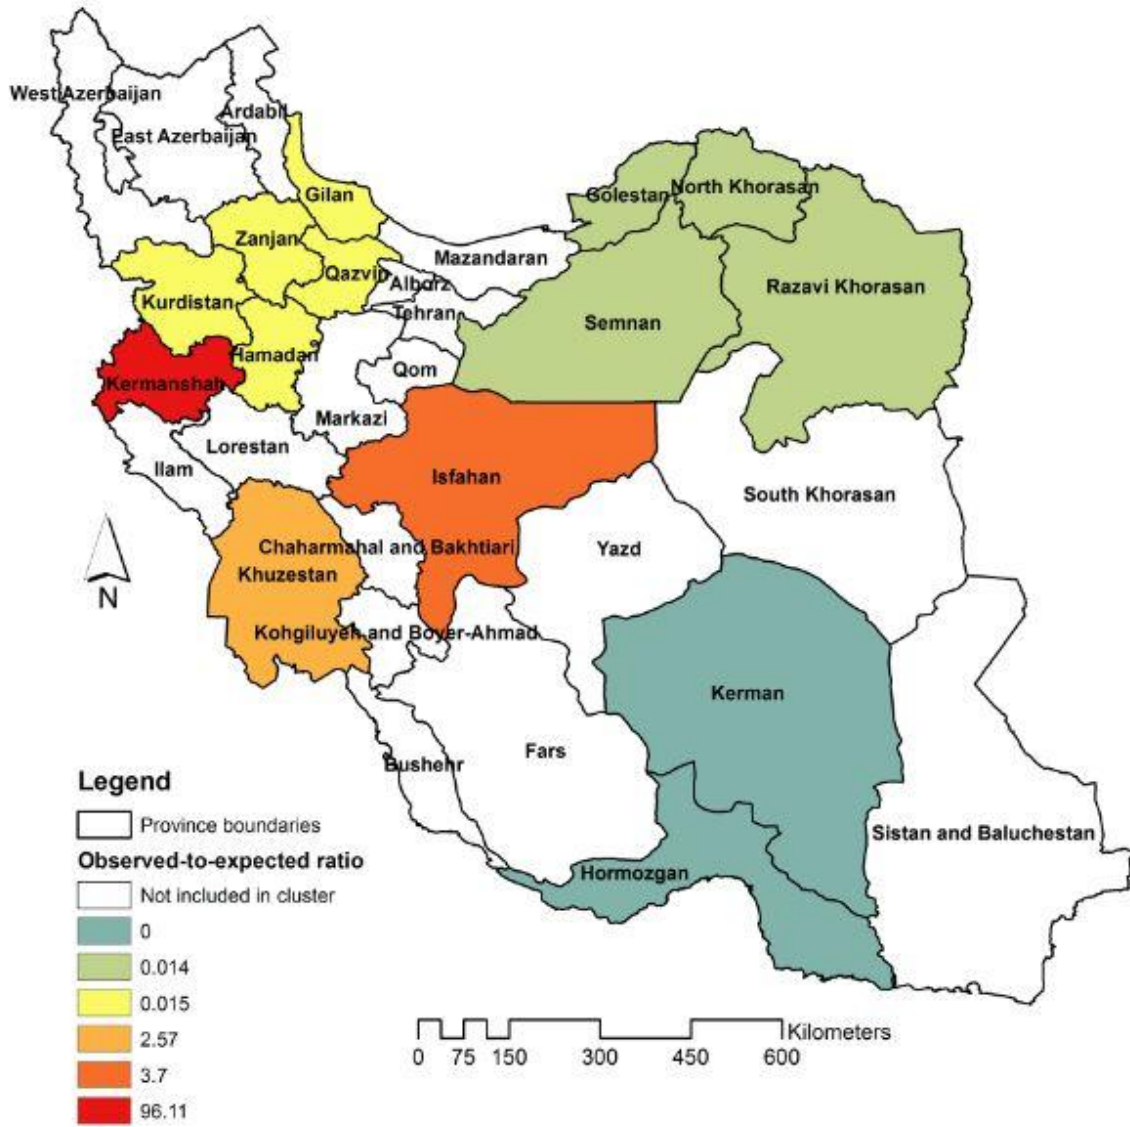

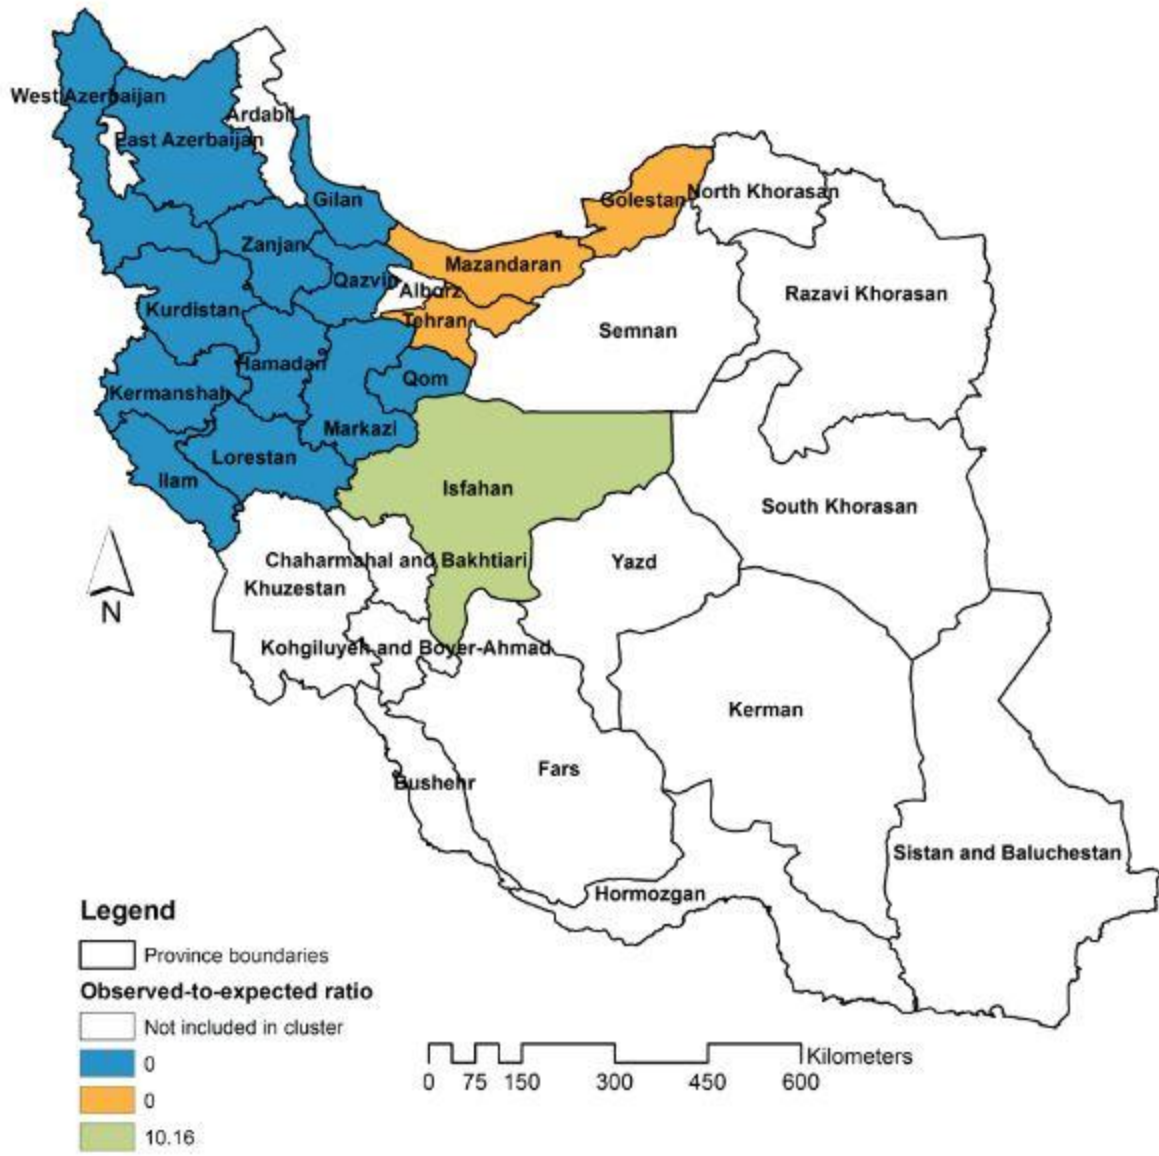

(B)

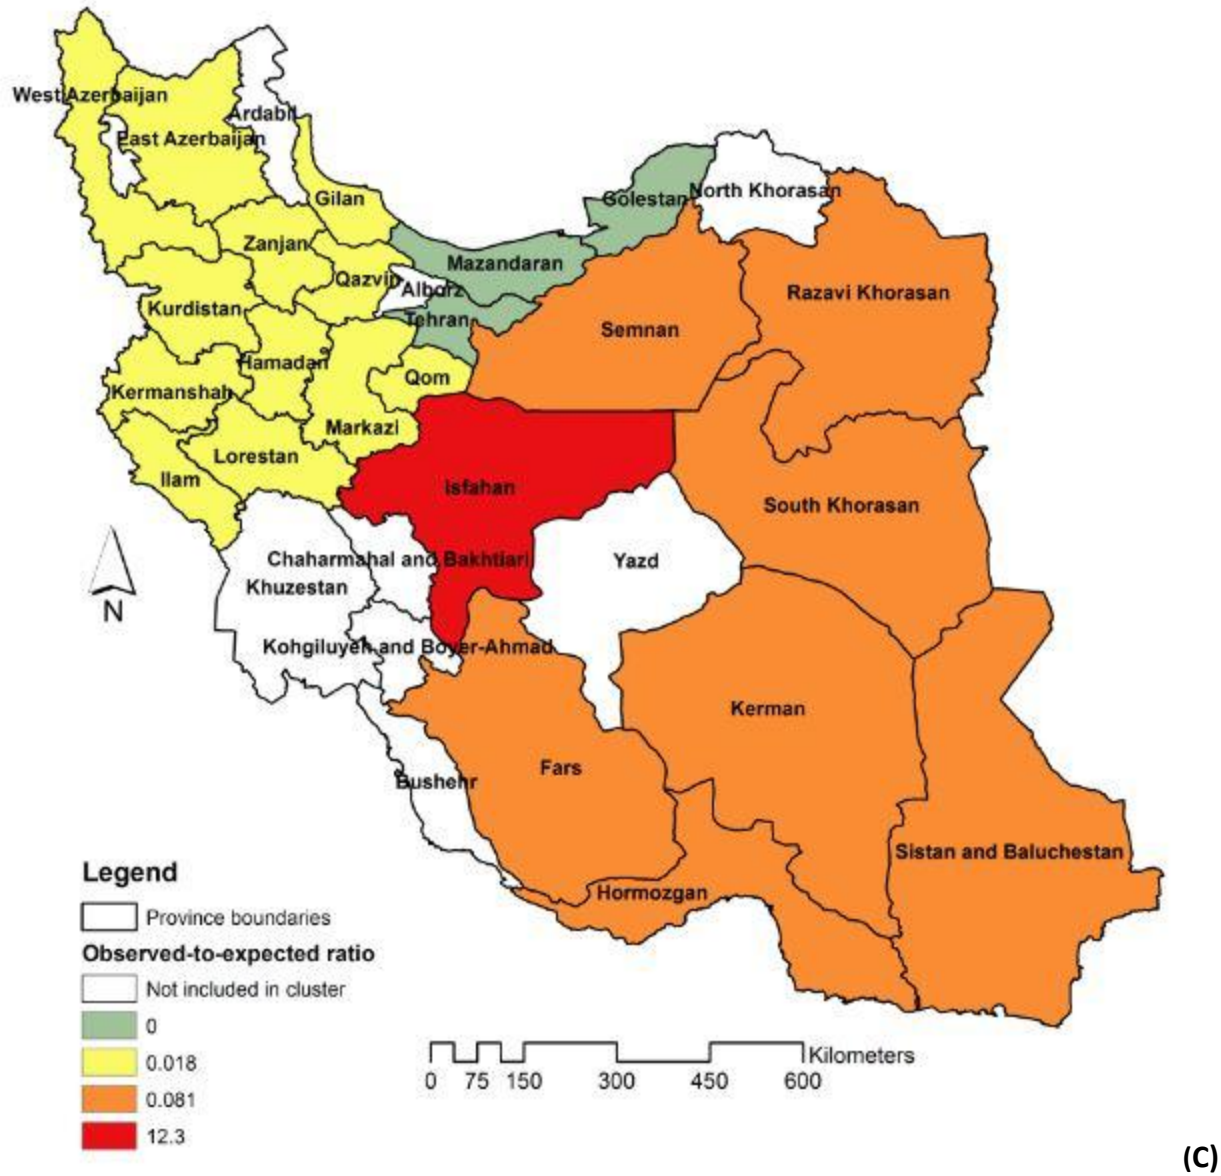

Figure S1. Clusters with statistically significant higher or lower than expected incidence of cutaneous leishmaniasis in Iranian army units (A) 2014-2015, (B) 2015-2016, and (C) 2016-2017.
